# Supplementary material for: Peptide-based FeS4 complexes: the zinc ribbon fold is unsurpassed to stabilize both the FeII and FeIII states
Source: Royal Society of Chemistry journal article supplement (doi:10.1039/c3dt53157k), 2014-01-01
Supplement: c3dt53157k.pdf [file c3dt53157k.pdf]

## Peptide-based FeS<sub>4</sub> complexes: the zinc ribbon fold is unsurpassed to stabilize both the Fe<sup>II</sup> and Fe<sup>III</sup> states

Aurélie Jacques,<sup>a,b</sup> Jean-Marc Latour,<sup>\*c</sup> Olivier Sénéque<sup>\*a</sup>

a) CNRS, UMR 5249, LCBM, 17 rue des Martyrs, F-38054 Grenoble, France.

b) Univ. Grenoble Alpes, LCBM, 17 rue des Martyrs, F-38054 Grenoble, France.

c) CEA, DSV/iRTSV/CBM, 17 rue des Martyrs, F-38054 Grenoble, France.

olivier.seneque@cea.fr

### Supporting Information

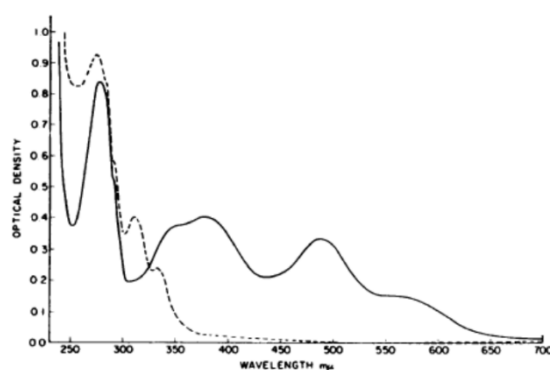

**Figure S1.** Absorption spectra of reduced (dashed line) and oxidized (solid line) forms of *Clostridium pasteurianum* rubredoxin taken from W. Lovenberg and B. E. Sobel, *Proc. Natl. Acad. Sci. U. S. A.*, 1965, **54**, 193–199.

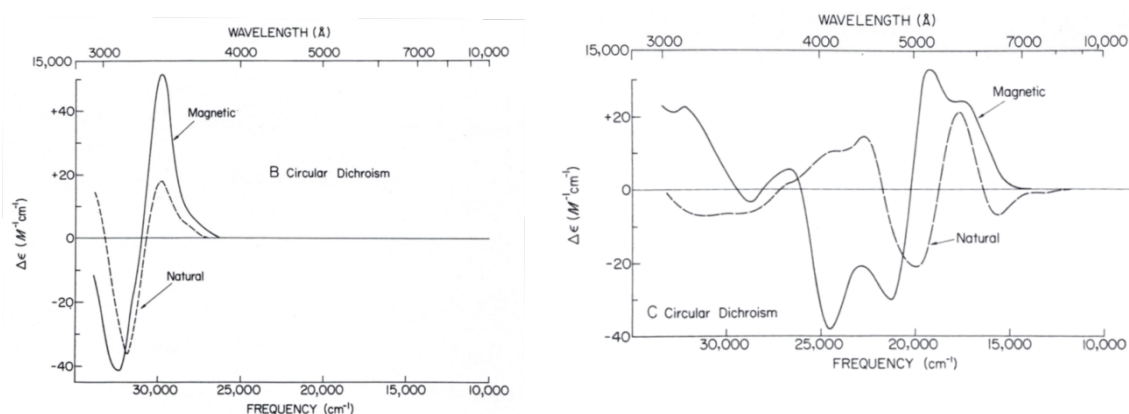

**Figure S2.** CD (dashed line) and MDC (solid line) spectra of reduced (left) and oxidized (right) forms of *Clostridium pasteurianum* rubredoxin taken from W. A. Eaton and W. Lovenberg, in *Iron-Sulfur Proteins*, ed. W. Lovenberg, Academic Press, New York, 1973, vol. 2, pp. 131–162.

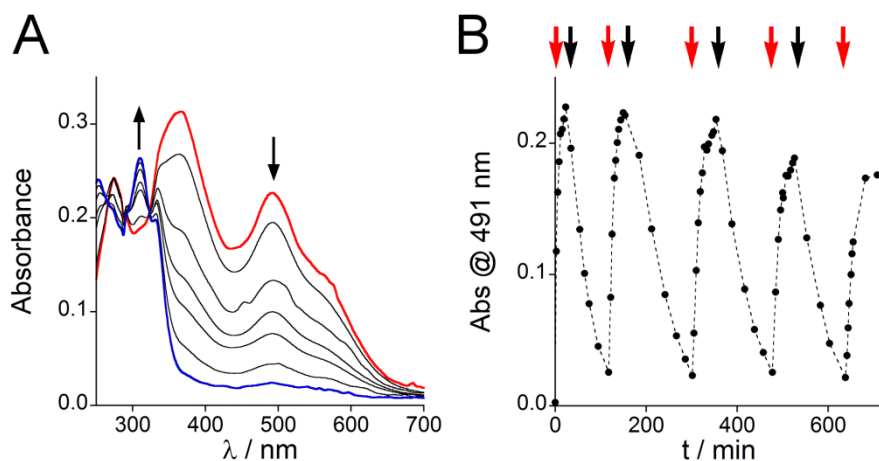

**Figure S3.** (A) UV-Vis monitoring of the reduction of  $\text{Fe}^{\text{III}}\cdot\text{L}_{\text{ZR}}$  under argon. (B) Redox cycling between  $\text{Fe}^{\text{II}}\cdot\text{L}_{\text{ZR}}$  and  $\text{Fe}^{\text{III}}\cdot\text{L}_{\text{ZR}}$  monitored at 491 nm. Red and black arrows indicate when air and argon was bubbled in the solution.

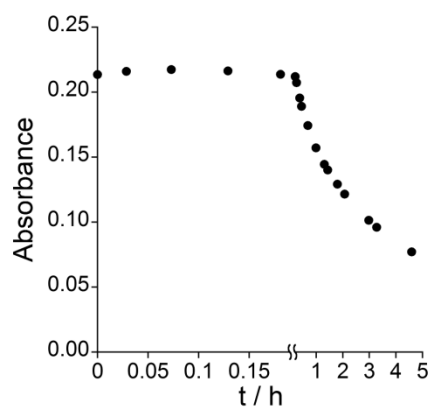

**Figure S4.** Absorbance (497 nm) monitoring of the stability of  $\text{Fe}^{\text{III}}\cdot\text{L}_{\text{TC}}$  ( $39\ \mu\text{M}$ ) under air in HEPES buffer 20 mM pH 7.5, TCEP  $750\ \mu\text{M}$ , 298 K.
